# Supplementary material
Source: PubMed Central journal article supplement (PMC4020917)

# Finger print region of 150ms NOESY: Sequential Assignment of MFGP in DMSO-d<sub>6</sub>

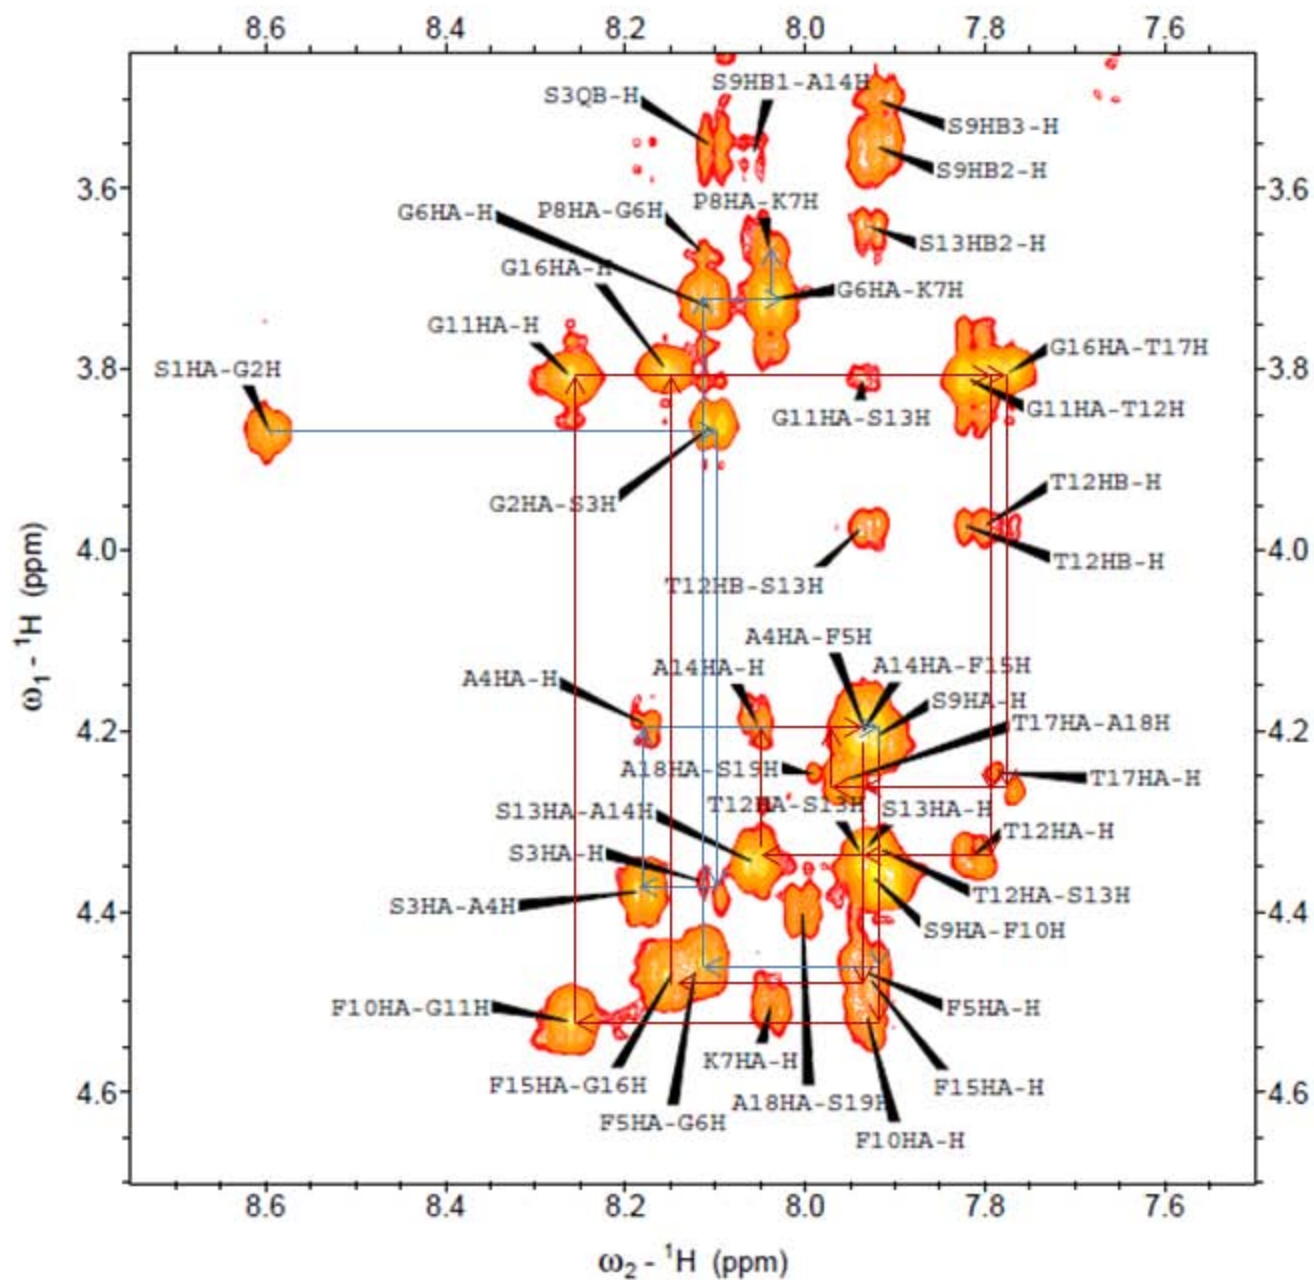

SI Fig 1

# $\text{C}\alpha$ region of the $^{13}\text{C}$ -HSQC of MFGP in $\text{DMSO-d}_6$

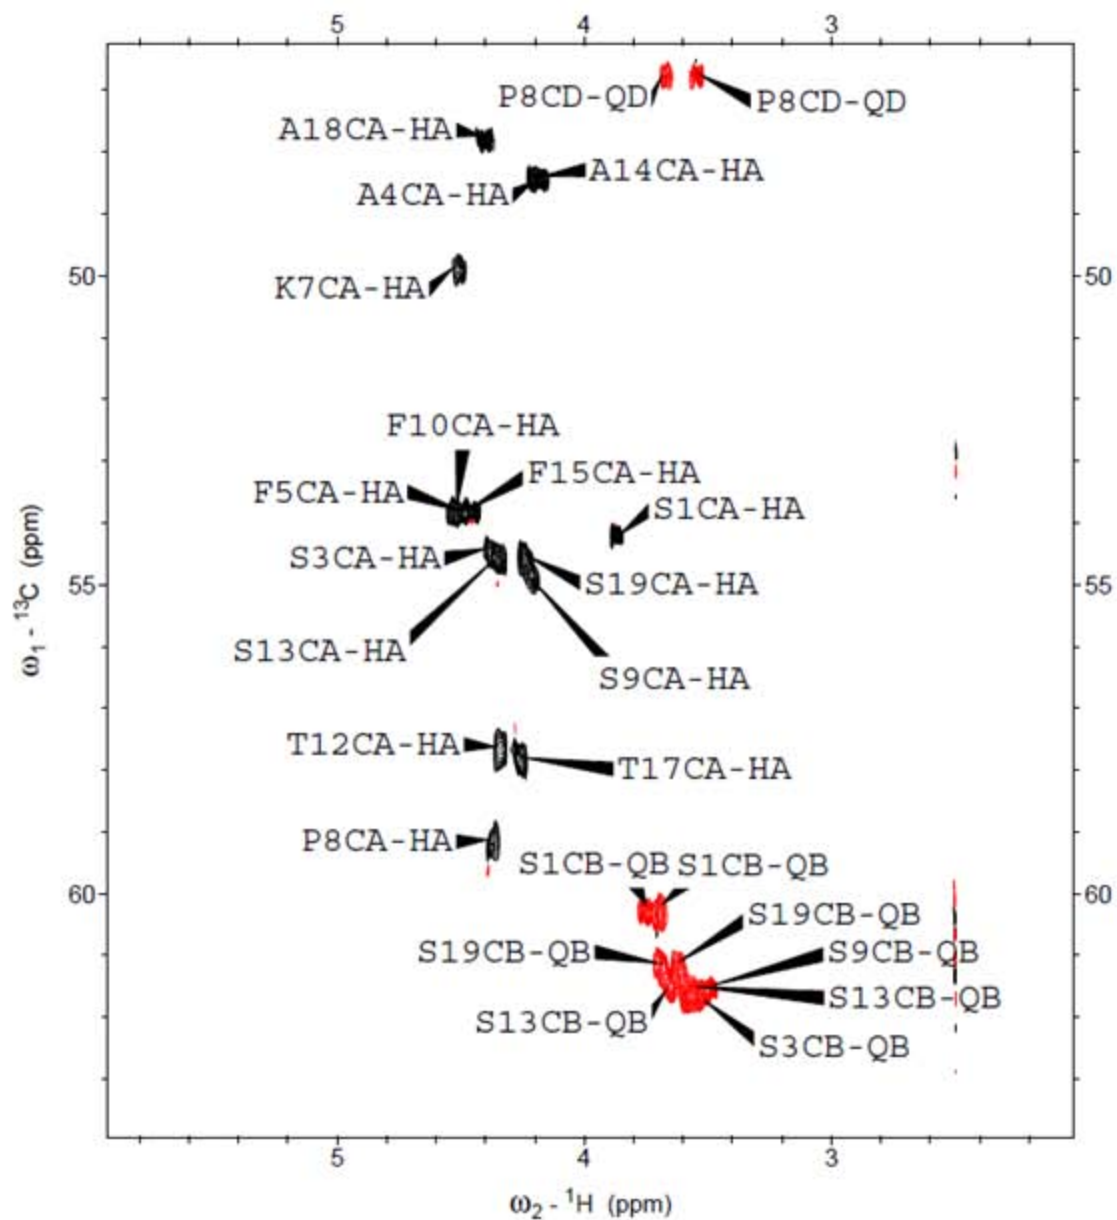

# Variation of $^{13}\text{C}\alpha$ and $^1\text{H}\alpha$ chemical shifts with respect to random coil chemical shifts

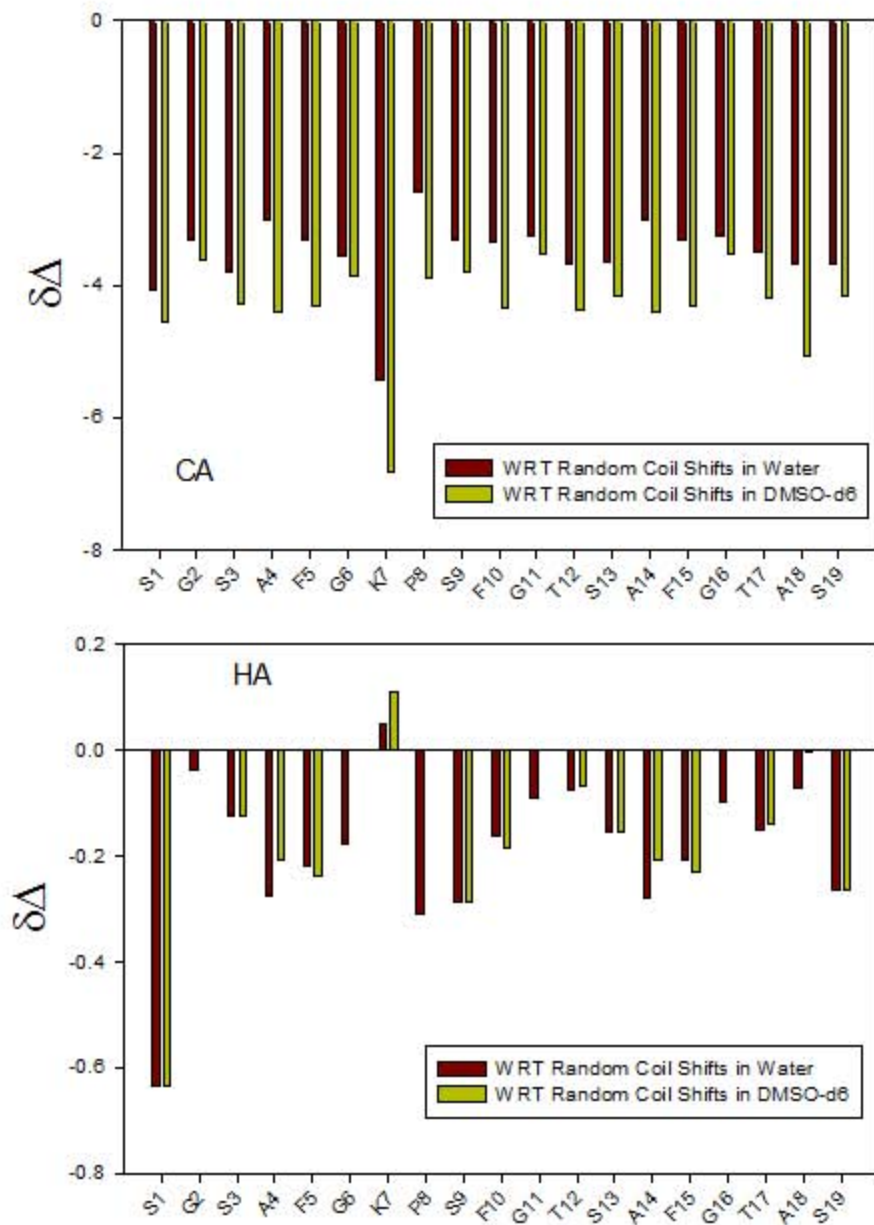

## Inter-residue NOE diagram

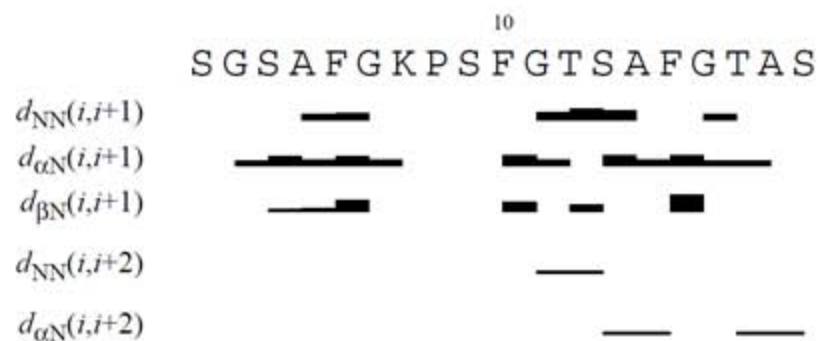

## Distribution of all NOE constraints

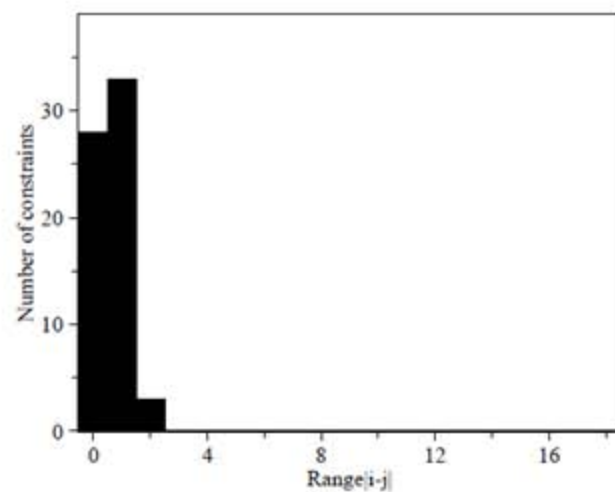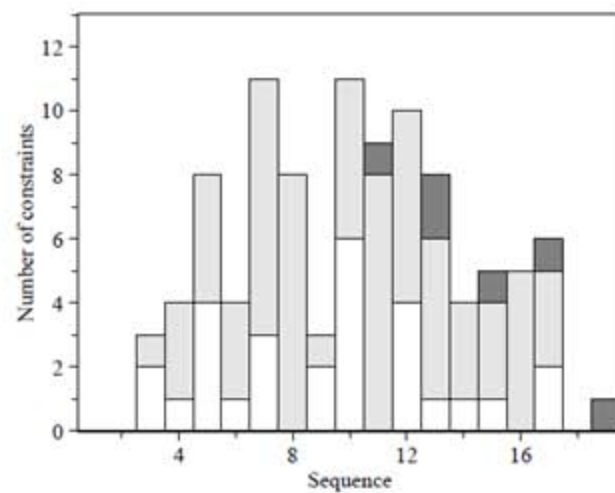

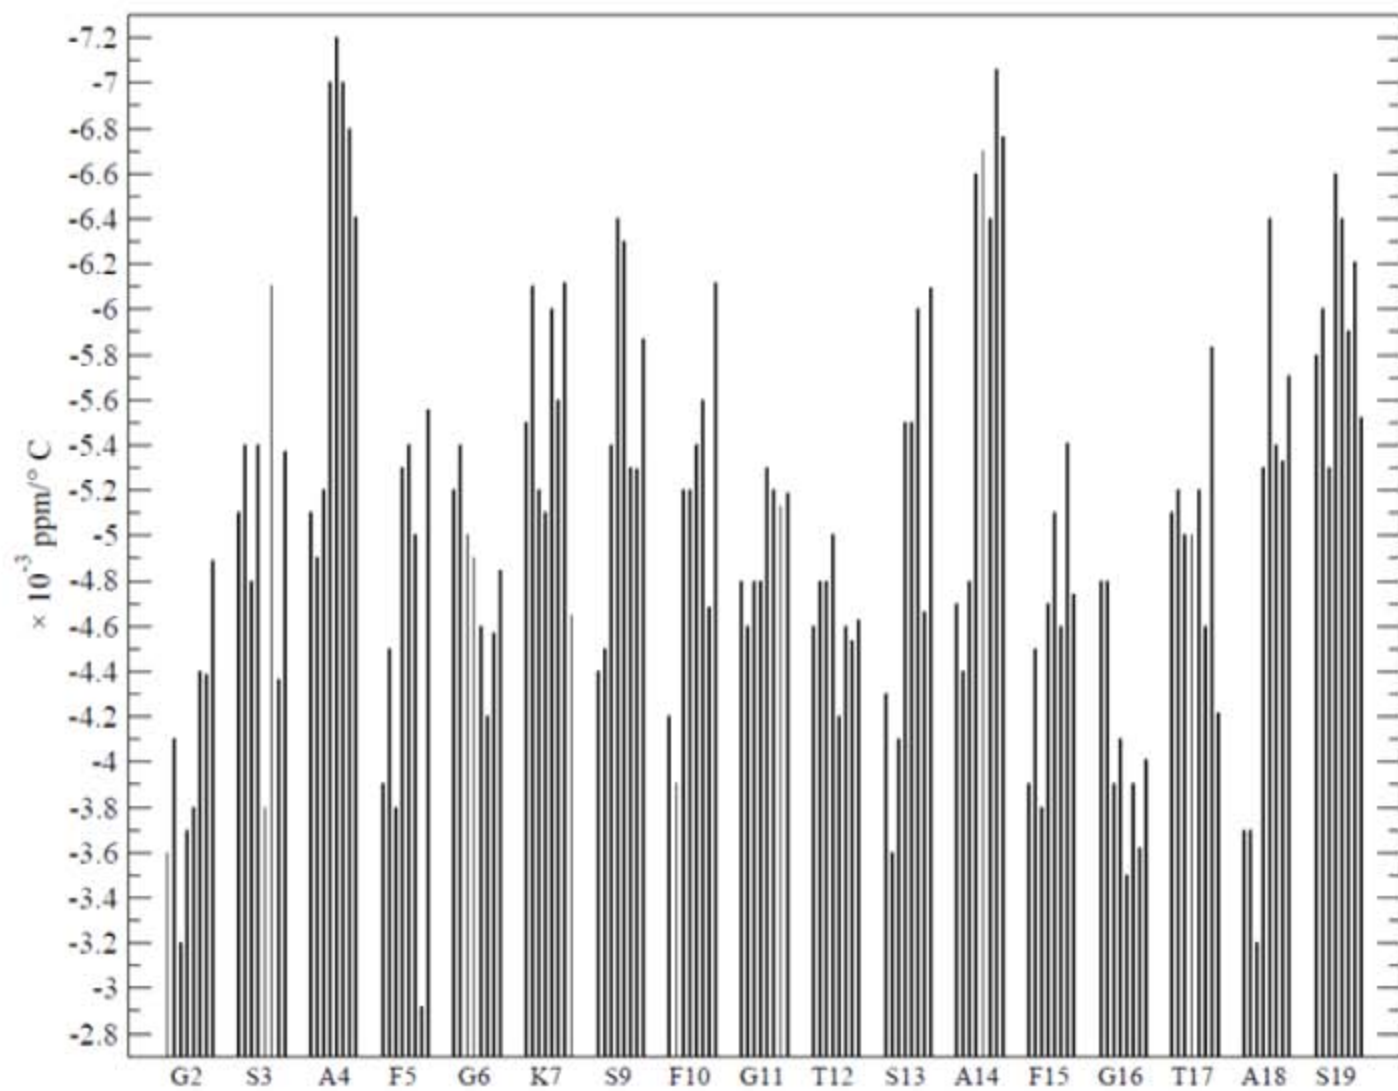

Supplement: NIHMS573554-supplement-Supp_FigureS1-S5.pdf [file NIHMS573554-supplement-Supp_FigureS1-S5.pdf]
